# Supplementary material
Source: PubMed Central journal article supplement (PMC2891595)
Supplement: NIHMS166013-supplement-01.pdf [file NIHMS166013-supplement-01.pdf]

## **Supplemental Material**

*The Supplemental Material includes Tables S1 and S2.*

Table S1: Heritabilities ( $h^2$ ) for regional traits, left hemisphere.

| Structure name                            | Average Thickness |      |         | Surface Area |      |         | Grey Volume* |      |         | Grey Volume** |      |         |
|-------------------------------------------|-------------------|------|---------|--------------|------|---------|--------------|------|---------|---------------|------|---------|
|                                           | $h^2$             | SE   | $p$     | $h^2$        | SE   | $p$     | $h^2$        | SE   | $p$     | $h^2$         | SE   | $p$     |
| <b>Frontal lobe</b>                       |                   |      |         |              |      |         |              |      |         |               |      |         |
| Middle frontal gyrus; rostral division    | 0.32              | 0.12 | 1.2e-03 | 0.59         | 0.12 | 1.0e-07 | 0.62         | 0.11 | 3.4e-10 | 0.51          | 0.11 | 1.0e-07 |
| Middle frontal gyrus; caudal division     | 0.37              | 0.12 | 1.3e-04 | 0.46         | 0.12 | 1.1e-05 | 0.51         | 0.12 | 8.0e-07 | 0.38          | 0.12 | 9.0e-05 |
| Inferior frontal gyrus; pars opercularis  | 0.53              | 0.12 | 5.0e-07 | 0.43         | 0.12 | 1.3e-05 | 0.49         | 0.12 | 3.0e-07 | 0.52          | 0.12 | 1.0e-07 |
| Inferior frontal gyrus; pars triangularis | 0.33              | 0.10 | 5.0e-05 | 0.49         | 0.12 | 6.3e-06 | 0.55         | 0.11 | 2.5e-08 | 0.56          | 0.11 | 4.2e-09 |
| Inferior frontal gyrus; pars orbitalis    | 0.24              | 0.10 | 5.0e-03 | 0.21         | 0.11 | 2.0e-02 | 0.25         | 0.12 | 7.2e-03 | 0.28          | 0.11 | 2.0e-03 |
| Orbitofrontal cortex; lateral division    | 0.13              | 0.10 | 7.7e-02 | 0.05         | 0.10 | 3.0e-01 | 0.12         | 0.11 | 1.0e-01 | 0.21          | 0.11 | 1.4e-02 |
| Orbitofrontal cortex; medial division     | 0.32              | 0.12 | 1.2e-03 | 0.52         | 0.12 | 8.0e-07 | 0.50         | 0.11 | 3.0e-07 | 0.50          | 0.11 | 1.0e-07 |
| Frontal pole                              | 0.38              | 0.12 | 6.0e-04 | 0.38         | 0.11 | 2.6e-05 | 0.44         | 0.11 | 4.6e-06 | 0.39          | 0.11 | 1.9e-05 |
| Precentral gyrus                          | 0.19              | 0.11 | 2.9e-02 | 0.11         | 0.10 | 1.3e-01 | 0.09         | 0.10 | 1.7e-01 | 0.16          | 0.12 | 7.5e-02 |
| Paracentral lobule                        | 0.50              | 0.11 | 3.0e-07 | 0.67         | 0.12 | 2.9e-09 | 0.66         | 0.11 | 4.8e-10 | 0.60          | 0.11 | 8.9e-09 |
| Paracentral lobule                        | 0.57              | 0.12 | 2.0e-07 | 0.30         | 0.13 | 5.8e-03 | 0.29         | 0.12 | 2.9e-03 | 0.42          | 0.12 | 3.3e-05 |
| <b>Temporal lobe – Medial aspect</b>      |                   |      |         |              |      |         |              |      |         |               |      |         |
| Entorhinal cortex                         | 0.29              | 0.12 | 2.8e-03 | 0.27         | 0.11 | 2.1e-03 | 0.20         | 0.10 | 1.1e-02 | 0.24          | 0.11 | 4.5e-03 |
| Parahippocampal gyrus                     | 0.36              | 0.11 | 1.2e-04 | 0.69         | 0.12 | 9.8e-10 | 0.60         | 0.13 | 4.0e-07 | 0.53          | 0.12 | 1.0e-06 |
| Temporal pole                             | 0.27              | 0.10 | 1.7e-03 | 0.15         | 0.12 | 8.3e-02 | 0.17         | 0.11 | 4.2e-02 | 0.14          | 0.10 | 6.2e-02 |
| Fusiform gyrus                            | 0.35              | 0.12 | 1.7e-04 | 0.37         | 0.11 | 8.2e-05 | 0.42         | 0.11 | 7.7e-06 | 0.49          | 0.11 | 3.0e-07 |
| <b>Temporal lobe – Lateral aspect</b>     |                   |      |         |              |      |         |              |      |         |               |      |         |
| Superior temporal gyrus                   | 0.72              | 0.11 | 9.2e-11 | 0.51         | 0.11 | 2.0e-07 | 0.67         | 0.10 | 2.0e-12 | 0.64          | 0.11 | 1.5e-10 |
| Middle temporal gyrus                     | 0.51              | 0.12 | 3.0e-07 | 0.44         | 0.11 | 8.5e-06 | 0.54         | 0.11 | 1.1e-08 | 0.41          | 0.11 | 3.3e-06 |
| Inferior temporal gyrus                   | 0.62              | 0.11 | 1.6e-08 | 0.46         | 0.12 | 1.3e-05 | 0.64         | 0.12 | 5.6e-09 | 0.54          | 0.11 | 1.0e-07 |
| Transverse temporal cortex                | 0.50              | 0.13 | 5.7e-06 | 0.51         | 0.12 | 2.0e-07 | 0.45         | 0.10 | 3.0e-07 | 0.52          | 0.10 | 9.1e-09 |
| Banks of the superior temporal sulcus     | 0.47              | 0.12 | 2.3e-06 | 0.27         | 0.11 | 1.1e-03 | 0.39         | 0.11 | 6.1e-06 | 0.40          | 0.11 | 2.3e-06 |
| <b>Parietal lobe</b>                      |                   |      |         |              |      |         |              |      |         |               |      |         |
| Postcentral gyrus                         | 0.84              | 0.11 | 2.7e-13 | 0.51         | 0.12 | 2.6e-06 | 0.64         | 0.12 | 2.0e-09 | 0.70          | 0.11 | 1.5e-11 |
| Supramarginal gyrus                       | 0.43              | 0.11 | 5.9e-06 | 0.37         | 0.11 | 2.8e-05 | 0.31         | 0.10 | 1.5e-04 | 0.38          | 0.10 | 1.2e-06 |
| Superior parietal cortex                  | 0.50              | 0.13 | 8.3e-06 | 0.52         | 0.11 | 4.0e-07 | 0.48         | 0.12 | 3.1e-06 | 0.44          | 0.11 | 4.9e-06 |
| Inferior parietal cortex                  | 0.52              | 0.12 | 3.0e-07 | 0.58         | 0.11 | 7.4e-11 | 0.58         | 0.10 | 2.9e-12 | 0.56          | 0.10 | 3.6e-12 |
| Precuneus cortex                          | 0.43              | 0.11 | 4.3e-06 | 0.58         | 0.12 | 3.1e-08 | 0.63         | 0.11 | 4.0e-10 | 0.66          | 0.11 | 5.7e-11 |
| <b>Occipital lobe</b>                     |                   |      |         |              |      |         |              |      |         |               |      |         |
| Lingual gyrus                             | 0.52              | 0.12 | 4.0e-07 | 0.43         | 0.12 | 4.1e-05 | 0.49         | 0.13 | 3.8e-06 | 0.59          | 0.12 | 1.3e-08 |
| Pericalcarine cortex                      | 0.26              | 0.11 | 4.2e-03 | 0.62         | 0.11 | 4.4e-10 | 0.63         | 0.11 | 3.7e-10 | 0.60          | 0.11 | 6.9e-11 |
| Cuneus cortex                             | 0.38              | 0.13 | 3.6e-04 | 0.39         | 0.11 | 1.7e-05 | 0.43         | 0.11 | 6.3e-06 | 0.48          | 0.11 | 5.0e-07 |
| Lateral occipital cortex                  | 0.60              | 0.11 | 2.5e-09 | 0.42         | 0.13 | 3.5e-04 | 0.50         | 0.12 | 2.2e-05 | 0.46          | 0.12 | 2.6e-05 |
| <b>Cingulate cortex</b>                   |                   |      |         |              |      |         |              |      |         |               |      |         |
| Rostral anterior division                 | 0.18              | 0.10 | 2.1e-02 | 0.50         | 0.12 | 1.4e-06 | 0.45         | 0.12 | 2.4e-06 | 0.50          | 0.12 | 6.0e-07 |
| Caudal anterior division                  | 0.32              | 0.11 | 5.1e-04 | 0.35         | 0.12 | 4.2e-04 | 0.22         | 0.10 | 5.9e-03 | 0.25          | 0.11 | 2.1e-03 |
| Posterior division                        | 0.33              | 0.11 | 6.5e-04 | 0.45         | 0.12 | 1.5e-05 | 0.42         | 0.10 | 3.7e-05 | 0.47          | 0.12 | 4.2e-06 |
| Isthmus division                          | 0.56              | 0.13 | 2.1e-06 | 0.57         | 0.10 | 2.3e-09 | 0.53         | 0.10 | 2.5e-09 | 0.59          | 0.10 | 6.1e-11 |
| Insular cortex                            | 0.68              | 0.12 | 7.0e-09 | 0.68         | 0.11 | 7.3e-11 | 0.69         | 0.11 | 4.4e-12 | 0.74          | 0.10 | 3.2e-14 |

\* Measurement in the surface-based representation.

\*\* Measurement in the volume-based representation.

Table S2: Heritabilities ( $h^2$ ) for regional traits, right hemisphere.

| Structure name                            | Average Thickness |      |         | Surface Area |      |         | Grey Volume* |      |         | Grey Volume** |      |         |
|-------------------------------------------|-------------------|------|---------|--------------|------|---------|--------------|------|---------|---------------|------|---------|
|                                           | $h^2$             | SE   | $p$     | $h^2$        | SE   | $p$     | $h^2$        | SE   | $p$     | $h^2$         | SE   | $p$     |
| <b>Frontal lobe</b>                       |                   |      |         |              |      |         |              |      |         |               |      |         |
| Superior frontal gyrus                    | 0.54              | 0.13 | 9.0e-07 | 0.46         | 0.12 | 3.9e-06 | 0.49         | 0.11 | 1.0e-07 | 0.43          | 0.11 | 7.6e-06 |
| Middle frontal gyrus; rostral division    | 0.42              | 0.12 | 3.3e-05 | 0.27         | 0.11 | 3.5e-03 | 0.31         | 0.10 | 2.1e-04 | 0.33          | 0.12 | 3.7e-04 |
| Middle frontal gyrus; caudal division     | 0.42              | 0.13 | 5.0e-05 | 0.45         | 0.12 | 2.2e-05 | 0.44         | 0.12 | 1.2e-05 | 0.44          | 0.12 | 5.6e-06 |
| Inferior frontal gyrus; pars opercularis  | 0.37              | 0.10 | 2.1e-06 | 0.43         | 0.12 | 2.5e-05 | 0.48         | 0.11 | 7.0e-07 | 0.54          | 0.11 | 1.0e-07 |
| Inferior frontal gyrus; pars triangularis | 0.25              | 0.12 | 7.4e-03 | 0.46         | 0.14 | 1.6e-04 | 0.40         | 0.14 | 4.6e-04 | 0.39          | 0.13 | 3.3e-04 |
| Inferior frontal gyrus; pars orbitalis    | 0.12              | 0.11 | 1.2e-01 | 0.22         | 0.11 | 1.4e-02 | 0.13         | 0.10 | 8.5e-02 | 0.21          | 0.10 | 1.0e-02 |
| Orbitofrontal cortex; lateral division    | 0.39              | 0.11 | 3.6e-05 | 0.56         | 0.11 | 3.1e-08 | 0.53         | 0.11 | 3.5e-08 | 0.54          | 0.11 | 3.8e-08 |
| Orbitofrontal cortex; medial division     | 0.44              | 0.12 | 3.5e-05 | 0.58         | 0.11 | 1.0e-07 | 0.46         | 0.12 | 1.1e-05 | 0.44          | 0.12 | 3.8e-05 |
| Frontal pole                              | 0.37              | 0.13 | 5.0e-04 | 0.17         | 0.10 | 3.1e-02 | 0.23         | 0.10 | 6.6e-03 | 0.19          | 0.11 | 3.1e-02 |
| Precentral gyrus                          | 0.55              | 0.11 | 2.4e-08 | 0.60         | 0.12 | 1.0e-07 | 0.68         | 0.11 | 1.1e-11 | 0.55          | 0.11 | 1.0e-07 |
| Paracentral lobule                        | 0.39              | 0.14 | 7.9e-04 | 0.31         | 0.13 | 4.4e-03 | 0.31         | 0.13 | 2.6e-03 | 0.27          | 0.13 | 6.6e-03 |
| <b>Temporal lobe – Medial aspect</b>      |                   |      |         |              |      |         |              |      |         |               |      |         |
| Entorhinal cortex                         | 0.39              | 0.13 | 3.8e-04 | 0.41         | 0.12 | 6.5e-05 | 0.30         | 0.12 | 2.1e-03 | 0.30          | 0.12 | 2.2e-03 |
| Parahippocampal gyrus                     | 0.32              | 0.12 | 1.1e-03 | 0.44         | 0.10 | 2.0e-06 | 0.45         | 0.12 | 2.0e-05 | 0.47          | 0.12 | 8.1e-06 |
| Temporal pole                             | 0.23              | 0.11 | 9.2e-03 | 0.23         | 0.13 | 2.6e-02 | 0.30         | 0.13 | 5.2e-03 | 0.22          | 0.12 | 3.0e-02 |
| Fusiform gyrus                            | 0.26              | 0.11 | 2.4e-03 | 0.61         | 0.10 | 1.3e-10 | 0.63         | 0.10 | 8.6e-13 | 0.69          | 0.09 | 4.8e-15 |
| <b>Temporal lobe – Lateral aspect</b>     |                   |      |         |              |      |         |              |      |         |               |      |         |
| Superior temporal gyrus                   | 0.66              | 0.12 | 6.2e-10 | 0.58         | 0.11 | 2.7e-08 | 0.71         | 0.10 | 1.1e-12 | 0.64          | 0.10 | 1.1e-10 |
| Middle temporal gyrus                     | 0.18              | 0.10 | 2.5e-02 | 0.36         | 0.10 | 5.1e-06 | 0.45         | 0.10 | 9.5e-09 | 0.42          | 0.10 | 4.9e-08 |
| Inferior temporal gyrus                   | 0.36              | 0.11 | 1.3e-04 | 0.40         | 0.12 | 1.9e-04 | 0.39         | 0.12 | 2.7e-04 | 0.53          | 0.12 | 2.0e-06 |
| Transverse temporal cortex                | 0.60              | 0.11 | 1.1e-09 | 0.65         | 0.11 | 2.1e-09 | 0.66         | 0.11 | 9.2e-10 | 0.72          | 0.11 | 5.6e-11 |
| Banks of the superior temporal sulcus     | 0.27              | 0.12 | 7.6e-03 | 0.34         | 0.11 | 7.3e-05 | 0.31         | 0.10 | 7.6e-05 | 0.37          | 0.10 | 7.7e-06 |
| <b>Parietal lobe</b>                      |                   |      |         |              |      |         |              |      |         |               |      |         |
| Postcentral gyrus                         | 0.56              | 0.12 | 1.0e-07 | 0.40         | 0.11 | 3.7e-05 | 0.39         | 0.11 | 1.6e-05 | 0.38          | 0.10 | 1.3e-05 |
| Supramarginal gyrus                       | 0.47              | 0.12 | 2.5e-06 | 0.62         | 0.11 | 4.6e-11 | 0.65         | 0.11 | 4.6e-12 | 0.65          | 0.11 | 1.2e-12 |
| Superior parietal cortex                  | 0.43              | 0.12 | 3.9e-05 | 0.49         | 0.12 | 6.7e-06 | 0.45         | 0.12 | 3.9e-05 | 0.49          | 0.12 | 2.5e-06 |
| Inferior parietal cortex                  | 0.40              | 0.12 | 2.0e-05 | 0.43         | 0.12 | 1.2e-05 | 0.47         | 0.12 | 8.0e-07 | 0.50          | 0.12 | 1.0e-07 |
| Precuneus cortex                          | 0.45              | 0.12 | 2.6e-05 | 0.77         | 0.10 | 7.9e-15 | 0.74         | 0.10 | 1.1e-14 | 0.75          | 0.10 | 1.5e-14 |
| <b>Occipital lobe</b>                     |                   |      |         |              |      |         |              |      |         |               |      |         |
| Lingual gyrus                             | 0.42              | 0.13 | 1.7e-04 | 0.55         | 0.12 | 3.0e-07 | 0.52         | 0.12 | 9.0e-07 | 0.53          | 0.12 | 4.0e-07 |
| Pericalcarine cortex                      | 0.24              | 0.11 | 5.0e-03 | 0.62         | 0.11 | 1.9e-10 | 0.60         | 0.11 | 1.3e-09 | 0.63          | 0.11 | 5.4e-11 |
| Cuneus cortex                             | 0.45              | 0.14 | 1.8e-04 | 0.32         | 0.12 | 8.5e-04 | 0.44         | 0.12 | 1.8e-05 | 0.63          | 0.13 | 2.6e-08 |
| Lateral occipital cortex                  | 0.66              | 0.11 | 1.5e-10 | 0.31         | 0.11 | 2.0e-03 | 0.28         | 0.11 | 2.2e-03 | 0.33          | 0.12 | 5.0e-04 |
| <b>Cingulate cortex</b>                   |                   |      |         |              |      |         |              |      |         |               |      |         |
| Rostral anterior division                 | 0.20              | 0.12 | 3.0e-02 | 0.07         | 0.11 | 2.6e-01 | 0.05         | 0.11 | 3.3e-01 | 0.06          | 0.10 | 2.9e-01 |
| Caudal anterior division                  | 0.35              | 0.12 | 2.4e-04 | 0.17         | 0.11 | 5.2e-02 | 0.05         | 0.10 | 3.0e-01 | 0.07          | 0.10 | 2.5e-01 |
| Posterior division                        | 0.39              | 0.11 | 3.0e-05 | 0.43         | 0.11 | 5.1e-06 | 0.33         | 0.11 | 2.0e-04 | 0.33          | 0.11 | 2.4e-04 |
| Isthmus division                          | 0.60              | 0.12 | 2.0e-07 | 0.70         | 0.11 | 1.1e-10 | 0.66         | 0.11 | 5.7e-10 | 0.67          | 0.11 | 4.3e-10 |
| <b>Insular cortex</b>                     | 0.37              | 0.12 | 3.6e-04 | 0.70         | 0.12 | 1.2e-10 | 0.66         | 0.11 | 1.0e-10 | 0.76          | 0.10 | 4.9e-14 |

\* Measurement in the surface-based representation.

\*\* Measurement in the volume-based representation.
